# Supplementary material for: Synthesis and Characterization of a New Cu(II) Paddle-Wheel-like Complex with 4-Vinylbenzoate as an Inorganic Node for Metal–Organic Framework Material Design
Source: MDPI journal article supplement (doi:10.3390/ma16134866), 2023-07-06
Supplement: s1 [file s1]

**Table S1.** Selected bond distances (Å), and angles (°) for the copper paddle-wheel complex  $[\text{Cu}_2(\mu\text{-vba})_4(\text{CH}_3\text{CN})_2]$ .

| Bond Length (Å) |          | Bond Angles (°)      |            |
|-----------------|----------|----------------------|------------|
| Cu(1) — O(1)    | 1.966(2) | O(1) — Cu(1) — O(4)  | 89.02(11)  |
| Cu(1) — O(2)    | 1.965(2) | O(1) — Cu(1) — N(1)  | 98.29(11)  |
| Cu(1) — O(3)    | 1.954(2) | O(1) — Cu(1) — O(2)  | 168.46(10) |
| Cu(1) — O(4)    | 1.964(2) | O(1) — Cu(1) — O(3)  | 88.88(11)  |
| Cu(1) — O(3)    | 1.954(2) | O(4) — Cu(1) — N(1)  | 97.60(11)  |
| Cu(1) — O(2)    | 1.965(2) | O(4) — Cu(1) — O(2)  | 89.99(11)  |
| Cu(1) — N(1)    | 2.239(3) | O(4) — Cu(1) — O(3)  | 168.28(10) |
| Cu(1) — Cu(1)   | 2.640(9) | N(1) — Cu(1) — O(2)  | 93.24(10)  |
| O(1) — C(10)    | 1.266(4) | N(1) — Cu(1) — O(3)  | 94.11(11)  |
| O(2) — C(10)    | 1.260(4) | O(2) — Cu(1) — O(3)  | 89.76(11)  |
| N(1) — C(19)    | 1.132(4) | Cu(1) — N(1) — C(19) | 170.7(3)   |
| C(19) — C(20)   | 1.460(5) | N(1) — C(19) — C(20) | 178.6(4)   |
| C(1) — C(2)     | 1.495(5) | O(3) — C(1) — O(4)   | 124.9(3)   |
| C(8) — C(9)     | 1.315(6) | O(3) — C(1) — C(2)   | 116.8(3)   |

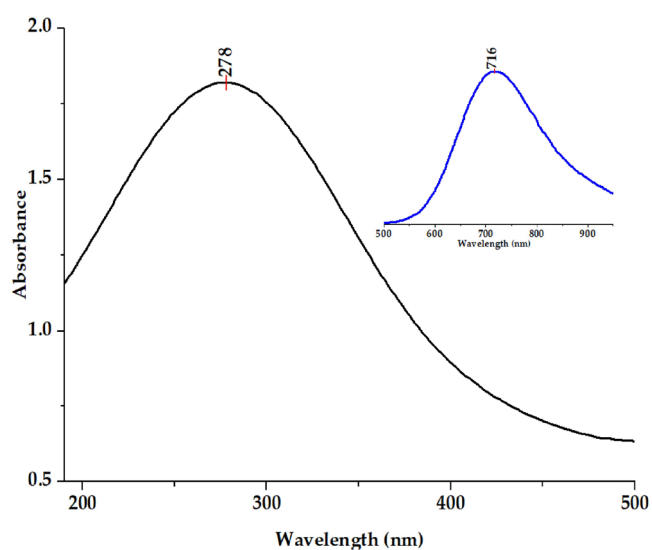

**Figure S1.** Electronic spectra in the UV region as a suspension in nujol, and in the visible region (inset) using DMF as solvent for the Cu(II) complex,  $[\text{Cu}_2(\mu\text{-vba})_4(\text{CH}_3\text{CN})_2]$ .
